# Supplementary material for: A visible-light-induced photoelectrochemical water-splitting system featuring an organo-photocathode along with a tungsten oxide photoanode
Source: Royal Society of Chemistry journal article supplement (doi:10.1039/c7ra05272c), 2017-01-01
Supplement: c7ra05272c1.pdf [file c7ra05272c1.pdf]

## Electronic Supplementary Information

### A visible-light-induced photoelectrochemical water splitting system featuring organo-photocathode along with tungsten oxide photoanode

Yuto Kawai, Keiji Nagai and Toshiyuki Abe\*

#### Contents:

1. Experimental details
2. An illustration of a three-electrode system employed in the present work [**Scheme S1**]
3. Action spectrum for photocurrents generated at WO<sub>3</sub>, and its absorption spectrum and SEM image [**Fig. S1**]
4. CVs measured at both WO<sub>3</sub> (photoanode) and ITO/ZnPc/C<sub>60</sub>-Pt (photocathode), and SEM images of C<sub>60</sub> surface and Pt-loaded C<sub>60</sub> surface in the organo-photoanode [**Fig. S2**]
5. Dependencies of both the amounts of H<sub>2</sub> and O<sub>2</sub> evolved during photoelectrochemical water splitting and light-to-hydrogen conversion efficiency on applied bias voltages in the reference WO<sub>3</sub>-Pt system [**Fig. S3**]
6. Data of control experiments in the reference WO<sub>3</sub>-Pt system in the presence of methanol or Fe<sup>3+</sup> ion [**Table S1**].

## Experimental details

### *Chemicals*

Commercially available C<sub>60</sub> of sublimated grade (>99.5%, Tokyo Chemical Industry (TCI)) was used as received. ZnPc (TCI) was purified by sublimation prior to use, as described elsewhere [1,2]. Other reagents were of extra-pure grade. ITO-coated glass plates (sheet resistance, 8  $\Omega\cdot\text{cm}^{-2}$ ; transmittance, >85%; ITO thickness, 174 nm) and FTO-coated glass plates (sheet resistance, 11  $\Omega\cdot\text{cm}^{-2}$ ; FTO thickness, 300 nm) were purchased from Asahi Glass Co., Ltd and Peccell Technologies, Inc., respectively.

### *Measurements*

The absorption spectrum was measured using a PerkinElmer Lambda-25 spectrophotometer. The resulting absorption spectra of ZnPc ( $\alpha$ -phase) [3-5] and C<sub>60</sub> [6] were identical to those reported previously, and their absorption coefficients were used to determine the thicknesses of the prepared film. Typically, the thicknesses of ZnPc and C<sub>60</sub> in the bilayer employed were estimated as 75 nm and 125 nm, respectively.

Gaseous products were analyzed using a gas chromatograph (GL Sciences, GC-3200) equipped with a thermal conductivity detector and a 5-Å molecular sieve column. Argon was used as the carrier gas.

The surface of WO<sub>3</sub> was observed through a scanning electron microscope (FE-SEM: JEOL, JSM-7000F).

### *Photoelectrochemical experiments*

Photoelectrochemical operation was conducted using a potentiostat (Hokuto Denko, HA-301) equipped with a function generator (Hokuto Denko, HB-104), a coulomb meter (Hokuto Denko, HF-201) and a X-Y recorder (GRAPHTEC, WX-4000). A halogen lamp (light intensity: ca. 90  $\text{mW}\cdot\text{cm}^{-2}$ ) was used as the light source for photocathode; irradiation was performed from the back side of the ITO-coated face. A xenon lamp (light intensity: ca. 50  $\text{mW}\cdot\text{cm}^{-2}$ ) was also used for irradiating the photoanode. Monochromatic light, generated by the combination of a monochromator (Soma Optics, Ltd., S-10) with a light source, was used to irradiate the sample for measuring action spectra for photocurrents. Light intensity was measured using a power meter (type 3A from Ophir Japan, Ltd., or CS-40 from ASAHI SPECTRA). All photoelectrochemical studies were performed under an Ar atmosphere in an aqueous H<sub>3</sub>PO<sub>4</sub> solution (pH = 2).

#### 1) Three-electrode system

Photoelectrochemical measurements (such as CV measurements and action spectral measurements) were conducted in a single-compartment glass cell with a working electrode, a Ag/AgCl (sat.) reference electrode and a Pt counter electrode (see **Scheme S1**). The deposition of Pt onto ITO/ZnPc/C<sub>60</sub> was performed under photocathodic conditions where the photoelectrode was polarized from +0.4 V (vs. Ag/AgCl (sat.)) to -0.2 V in an acidic solution (pH = 2) containing  $5.0 \times 10^{-4} \text{ mol} \cdot \text{dm}^{-3} \text{ H}_2\text{PtCl}_6 \cdot 6\text{H}_2\text{O}$  under anaerobic conditions. The amount of Pt deposited was controlled by the amount of charge passed (typically,  $4.0 \times 10^{-2} \text{ C}$ ).

## 2) Two-electrode system

Photoelectrochemical water splitting was conducted in a system of WO<sub>3</sub> (photoanode, 1 cm<sup>2</sup>) and ITO/ZnPc/C<sub>60</sub>-Pt (photocathode, 1 cm<sup>2</sup>). In order to avoid the spontaneous recombination of H<sub>2</sub> and O<sub>2</sub>, a cell with twin compartments separated by a salt bridge was employed for the water splitting (Scheme 1). For preparing the salt bridge, agar (1.3 g) and KNO<sub>3</sub> (4.74 g) were first dissolved in hot water ( $1.0 \times 10^{-2} \text{ dm}^3$ ). Then the mixture was allowed to flow into the bridging part of the cell and solidify at room temperature. Water-splitting studies were also conducted using the aforementioned electrochemical apparatus.

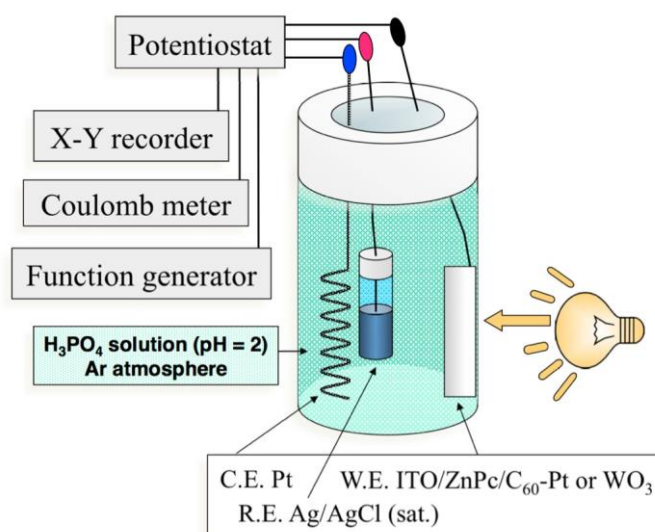

**Scheme S1** An illustration of a three-electrode system employed in the present work

## Calculation methods

### 1) Faradic efficiency (F.E.)

The F.E. value was calculated according to the following procedure:

- i) During the photoelectrochemical splitting of water, the amount of charge passed was measured by a coulomb meter. Based on the resulting amount of charge, the theoretical amounts of H<sub>2</sub> and O<sub>2</sub> evolved were calculated.

ii) After the photoelectrochemical reaction, the amounts of H<sub>2</sub> and O<sub>2</sub> evolved were quantified by a gas chromatograph.

The F.E. value for H<sub>2</sub> (or O<sub>2</sub>) evolution is then determined using the following equation:

$$\begin{aligned} \text{F.E. (\%)} &= [\text{amount of H}_2 \text{ (or O}_2\text{) evolved}]/[\text{theoretical amount of H}_2 \text{ (or O}_2\text{)}] \times 100 \\ &= [\text{amount of H}_2 \text{ (or O}_2\text{) evolved}]/[(\text{amount of charge passed})/(nF)] \times 100, \end{aligned}$$

where  $n$  is the number of electrons that participated in the evolution of a gaseous product ( $n = 2$  for the reduction of H<sup>+</sup> into H<sub>2</sub>;  $n = 4$  for O<sub>2</sub> evolution from water), and  $F$  is Faraday's constant (i.e.  $9.65 \times 10^4 \text{ C}\cdot\text{mol}^{-1}$ ).

## 2) Light-to-hydrogen conversion efficiency ( $\eta$ )

The  $\eta$  value was estimated using the following equation:

$$\eta (\%) = (\Delta_r G^\circ(\text{H}_2\text{O}) [\text{kJ}\cdot\text{mol}^{-1}] \times \text{amount of H}_2 \text{ evolved} [\text{mol}] - \text{voltage applied between anode and cathode} [\text{V}] \times \text{charge passed during water splitting} [\text{C}]) / (\text{total of incident photoenergy irradiated for photoelectrodes} [\text{J}]) \times 100,$$

where  $\Delta_r G^\circ(\text{H}_2\text{O})$  [ $237.13 \text{ kJ}\cdot\text{mol}^{-1}$ ] is Gibbs free energy for the decomposition of H<sub>2</sub>O into H<sub>2</sub> (1 mol). This calculation is in accordance with the previous procedure [7].

## 3) Incident photon-to-current efficiency (IPCE)

In order to obtain an action spectrum for photocurrent, the IPCE value was calculated using the following equation:

$$\text{IPCE (\%)} = [I/e]/[W/\varepsilon] \times 100,$$

where  $I$  ( $\text{A}\cdot\text{cm}^{-2}$ ) is the photocurrent density,  $e$  (C) is the elementary electric charge,  $W$  ( $\text{W}\cdot\text{cm}^{-2}$ ) is the light intensity, and  $\varepsilon$  is the photon energy.

- [1] T. Abe, K. Nakamura, H. Ichinohe and K. Nagai, *J. Mater. Sci.*, **47**(2), 1071 (2012).
- [2] T. Abe, Y. Hiyama, K. Fukui, K. Sahashi, K. Nagai, *Int. J. Hydrogen Energy*, **40**, 9165 (2015).
- [3] T. Morikawa, C. Adachi, T. Tsutsui and S. Saito, *Nippon Kagaku Kaishi*, 962 (1990).
- [4] J. H. Sharp and M. Lardon, *J. Phys. Chem.*, **72**, 3230 (1968).
- [5] H. Yoshida, Y. Tokura and T. Koda, *Chem. Phys.* **109**, 375 (1986).
- [6] A. Capobianchi and M. Tucci, *Thin Solid Films*, **451-452**, 33 (2004).
- [7] M. Radecka, M. Rekas, A. Trenczek-Zajac and K. Zakrzewska, *J. Power Sources*, **181**, 46 (2008).

*Action spectrum for photocurrents generated at WO<sub>3</sub>, and its absorption spectrum and SEM image*

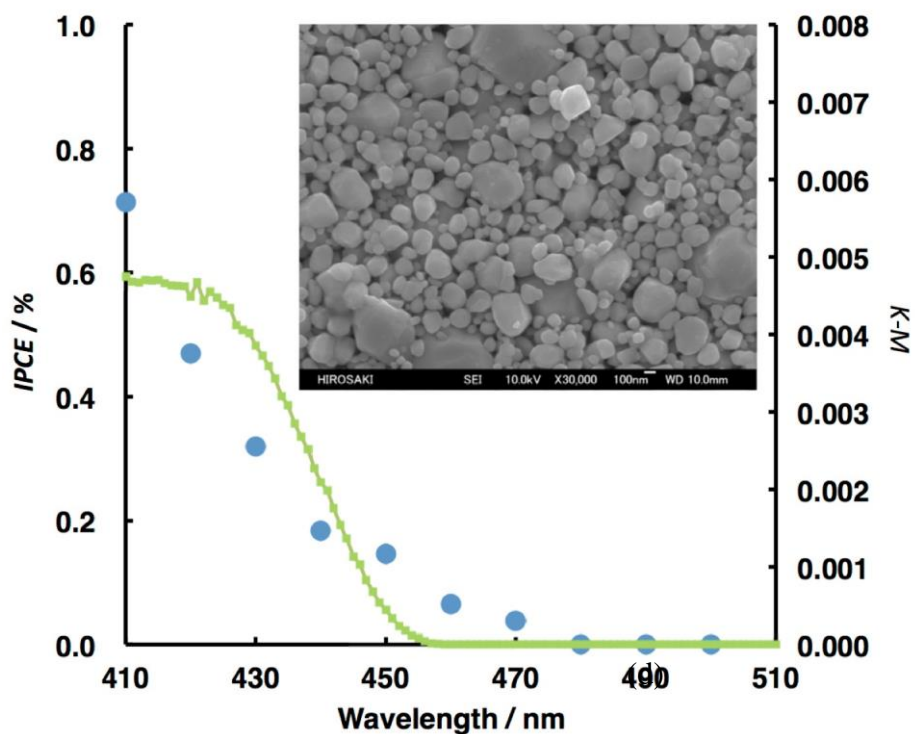

**Fig. S1** Action spectrum of the photocurrents generated at WO<sub>3</sub> and its absorption spectrum. Inset shows SEM image of WO<sub>3</sub>. In this study, photocurrents were measured in a three-electrode system depicted in Scheme S1 (*vide supra*)

Geometrical area of photoelectrode: WO<sub>3</sub>, 1 cm<sup>2</sup>  
Applied potential: +0.35 V (vs. Ag/AgCl (sat.))  
Electrolyte: H<sub>3</sub>PO<sub>4</sub> solution (pH = 2)

A detailed interpretation of action spectra acquired for ITO/MPC/C<sub>60</sub>-Pt (M = H<sub>2</sub> and Zn) was stated in the previous reports (i.e. T. Abe *et al.*, (i) *J. Phys. Chem. C* 2011, **115**, 7701 and (ii) *Int. J. Hydrogen Energy* 2015, **40**, 9165).

CVs measured at both  $WO_3$  (photoanode) and ITO/ZnPc/ $C_{60}$ -Pt (photocathode)

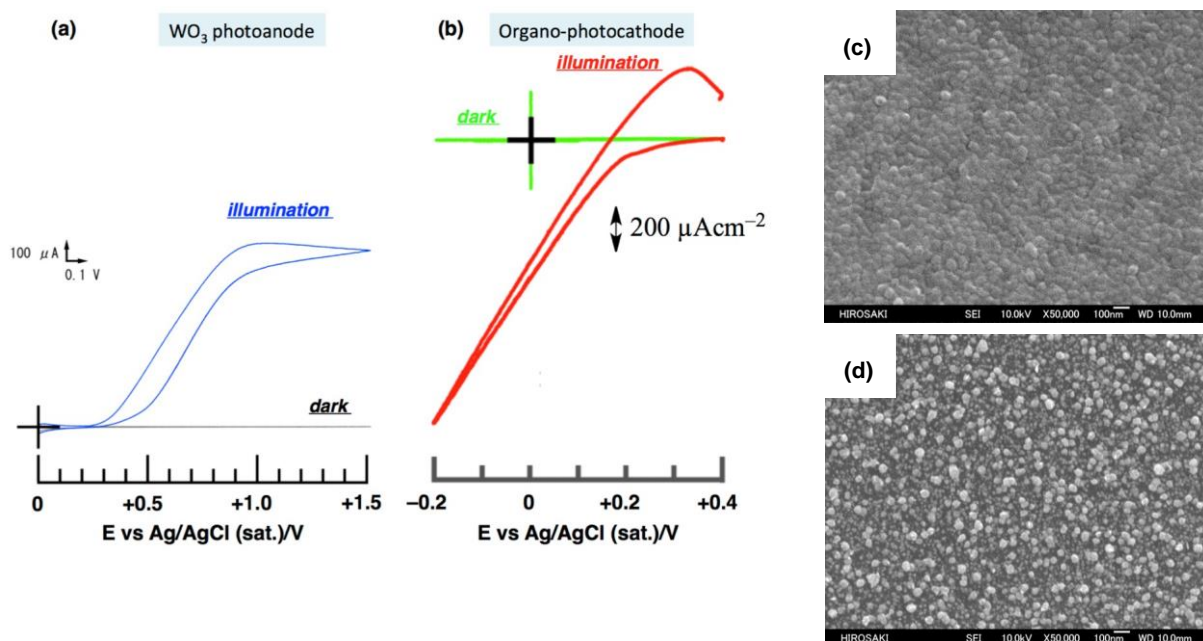

**Fig. S2** Cyclic voltammograms measured at  $WO_3$  (a, photoanode) and ITO/ZnPc/ $C_{60}$ -Pt (b, photocathode [1]). CV measurements were conducted in the three-electrode system depicted in Scheme S1 (*vide supra*). SEM images of  $C_{60}$  surface (c) and Pt-loaded  $C_{60}$  surface (d) in the organo-photocathode are also depicted.

Geometrical area of photoelectrodes:  $WO_3$ ,  $1 \text{ cm}^2$ ; ITO/ZnPc/ $C_{60}$ -Pt,  $1 \text{ cm}^2$   
 Film thickness in organic p-n bilayer: ZnPc, 75 nm;  $C_{60}$ , 125 nm  
 Electrolyte:  $H_3PO_4$  solution (pH = 2)  
 Light intensity: ca.  $90 \text{ mW} \cdot \text{cm}^{-2}$  for photoanode, and ca.  $50 \text{ mW} \cdot \text{cm}^{-2}$  for photocathode  
 Scan rate:  $20 \text{ mV} \cdot \text{s}^{-1}$

[1] T. Abe, Y. Hiyama, K. Fukui, K. Sahashi, K. Nagai, *Int. J. Hydrogen Energy*, **40**, 9165 (2015).

*Dependencies of both the amounts of H<sub>2</sub> and O<sub>2</sub> evolved during photoelectrochemical water splitting and light-to-hydrogen conversion efficiency on applied bias voltages in the reference WO<sub>3</sub>-Pt system*

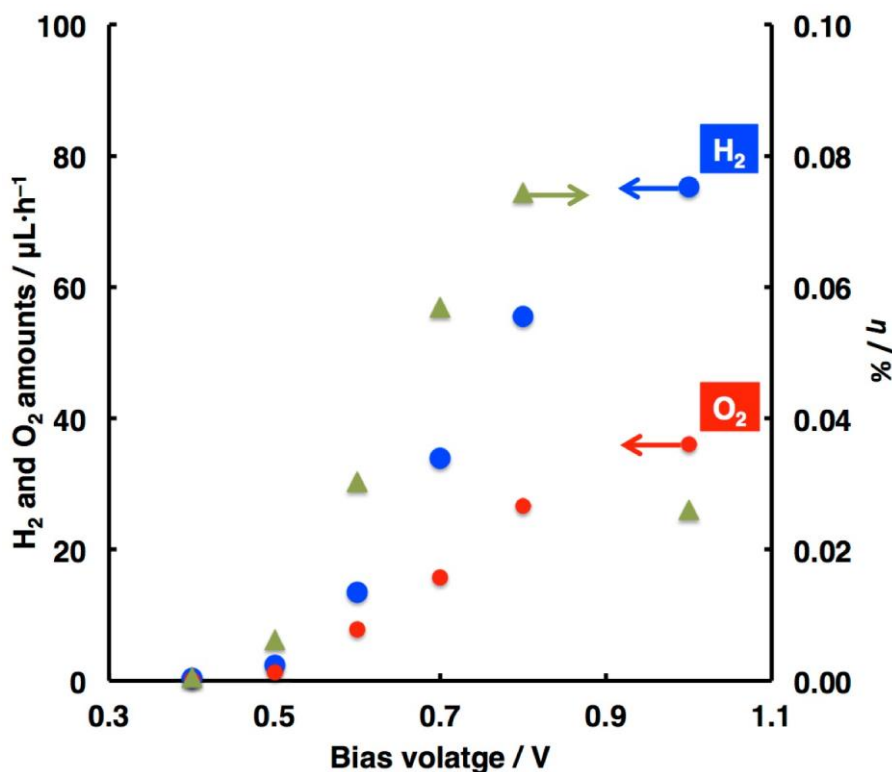

**Fig. S3** Relationships of both the amounts of H<sub>2</sub> and O<sub>2</sub> evolved and  $\eta$  values with applied bias voltages. This study was conducted in a two-electrode system depicted in Scheme 1

Photoanode (geometrical area): WO<sub>3</sub> (1 cm<sup>2</sup>)  
 Counter electrode: Pt wire  
 Electrolyte: H<sub>3</sub>PO<sub>4</sub> solution (pH = 2)  
 Light intensity: ca. 50 mW·cm<sup>-2</sup>

Data of photoelectrochemical water splitting at 0.4 V  
 H<sub>2</sub> amount = 0.39 μL·h<sup>-1</sup>, O<sub>2</sub> amount = 0.18 μL·h<sup>-1</sup>, and  $\eta$  value = 5.2 × 10<sup>-4</sup>%

**Table S1** Data of control experiments in the WO<sub>3</sub> (photoanode) and Pt (cathode) system.<sup>a</sup>

| System               | H <sub>2</sub> evolved/ $\mu\text{L}\cdot\text{h}^{-1}$ | O <sub>2</sub> evolved/ $\mu\text{L}\cdot\text{h}^{-1}$ | Note                                  |
|----------------------|---------------------------------------------------------|---------------------------------------------------------|---------------------------------------|
| Entry 1 <sup>b</sup> | 55.6                                                    | 26.6                                                    | No control system.                    |
| Entry 2 <sup>c</sup> | 106                                                     | -----                                                   | In the presence of methanol.          |
| Entry 3 <sup>d</sup> | -----                                                   | 25.3                                                    | In the presence of Fe <sup>3+</sup> . |

<sup>a</sup> Bias voltage of 0.8 V was applied to the system with experimental conditions similar to those in Fig. 1. <sup>b</sup> Data from Fig. S3. <sup>c</sup> A methanol solution (methanol/water(v/v) = 1:1, pH = 2) was used. <sup>d</sup> An aqueous solution of Fe(NO<sub>3</sub>)<sub>3</sub> (5 mM, pH = 2) was employed.
